# Supplementary material for: Diagnostic Value of Chromosomal Microarray Analysis for Fetal Congenital Heart Defects with Different Cardiac Phenotypes and Extracardiac Abnormalities
Source: MDPI journal article supplement (doi:10.3390/diagnostics13081493), 2023-04-20
Supplement: s1 [file s1]

Supplementary Material Table S1. Shows the details of pathogenic copy number variations in 38 CHD fetuses.

| case | Cardiac and Extra Cardiac Phenotype            | Chr | pCNVs                       | Type | Size<br>(Mb) | Syndromes                              | Major genes<br>included                       | Pattern of<br>Inheritance | Outcomes                  |
|------|------------------------------------------------|-----|-----------------------------|------|--------------|----------------------------------------|-----------------------------------------------|---------------------------|---------------------------|
| 1    | VSD, endocardial fibroelastosis,<br>MCDK       | 1   | 849,466-5,747,184           | del  | 4.8          | 1p36 deletion<br>syndrome              | <i>PRDM16</i> ,<br><i>SKI</i>                 | /                         | TP, Autopsy <sup>a</sup>  |
| 2    | TOF, FGR, limb abnormality                     | 5   | 36,069,681-40,557,872       | del  | 4.4          | Cornelia de Lange                      | <i>NIPBL</i>                                  | /                         | TP                        |
| 3    | VSD, spina bifida                              | 6   | 163,732,938-<br>170,914,297 | del  | 7.1          | 6q terminal deletion<br>syndrome       | <i>DLL1</i>                                   | /                         | LTF                       |
| 4    | CoA, FGR                                       | 7   | 72,653,992-74,154,209       | del  | 1.5          | WBS                                    | <i>ELN</i> , <i>LIMK1</i>                     | /                         | LTF                       |
| 5    | CAT, VSD, horseshoe kidney                     | 8   | 160,101-7,120,108           | del  | 6.9          |                                        | <i>CSMD1</i> ,<br><i>ANGPT2</i>               | /                         | TP, Autopsy <sup>a</sup>  |
| 6    | HRHS, VSD, callosal dysplasia,<br>SUA          | 10  | 98,561,770-105,586,041      | dup  | 7.0          |                                        | <i>LBX1</i> ,<br><i>BTRC</i> ,<br><i>POLL</i> | /                         | TP, Autopsy <sup>b1</sup> |
| 7    | HLHS, hemivertebra                             | 11  | 12,674,297-13,486,847       | del  | 8.8          |                                        | <i>FLI1</i>                                   | /                         | TP, Autopsy <sup>a</sup>  |
| 8    | Single ventricle, DORV, PS                     | 11  | 81,354,834-106,214,708      | del  | 24.8         |                                        | <i>FZD4</i>                                   | /                         | TP                        |
| 9    | Aortic stenosis, VSD, hydrocephalus            | 12  | 103,403,037-<br>133,777,562 | dup  | 30.3         | Noonan syndrome 1                      | <i>PTPN11</i> ,<br><i>TBX5</i>                | /                         | TP                        |
| 10   | VSD, CCAM                                      | 16  | 15,438,164-18,172,468       | dup  | 2.7          | 16p13.11 recurrent<br>microduplication | <i>MYH11</i>                                  | /                         | LTF                       |
| 11   | TOF, hyperechogenic bowel,<br>ventriculomegaly | 17  | 16,736,262-20,417,235       | del  | 3.6          | SMS                                    | <i>RAI1</i>                                   | /                         | TP, Autopsy <sup>a</sup>  |
| 12   | VSD, osteogenic dysplasia                      | 17  | 14,077,970-15,482,833       | del  | 1.4          | HNPP                                   | <i>PMP22</i>                                  | /                         | LTF                       |
| 13   | PA, VSD, RAA, choroid plexus<br>cyst           | 21  | 33,623,086-35,352,874       | del  | 1.7          | Tokita-Kim syndrome                    | <i>RUNX1</i> ,<br><i>SON</i> , <i>SYNJ1</i>   | /                         | TP                        |

|    |                                                   |    |                       |     |     |                                   |               |        |                           |
|----|---------------------------------------------------|----|-----------------------|-----|-----|-----------------------------------|---------------|--------|---------------------------|
| 14 | VSD, PS, tricuspid valve dysplasia                | 17 | 87,009–1,184,534      | del | 1.1 | MDLS                              | <i>LIS1</i>   | /      | TP, Autopsy <sup>c</sup>  |
|    |                                                   | 22 | 18,919,942–21,440,514 | del | 2.5 | 22q11.2 DS                        | <i>TBX1</i>   |        |                           |
| 15 | d-TGA, VSD                                        | 22 | 18,901,424-21,790,211 | del | 2.8 | 22q11.2 DS                        |               | /      | TP                        |
| 16 | VSD, cor triatriatum, mitral valve dysplasia, SUA | 22 | 18,984,187-21,927,646 | dup | 2.9 | 22q11.2 microduplication syndrome |               | /      | TP, Autopsy <sup>a</sup>  |
| 17 | TOF(APVS), VSD                                    | 22 | 18,916,842-21,798,907 | del | 2.8 | 22q11.2 DS                        |               | denovo | TP                        |
| 18 | VSD, aortic stenosis, hydramnios                  | 22 | 18,636,749-21,800,471 | del | 3.1 | 22q11.2 DS                        |               | denovo | TP                        |
| 19 | TOF                                               | 22 | 18,644,790-21,465,659 | del | 2.8 | 22q11.2 DS                        |               | denovo | TP, Autopsy <sup>c</sup>  |
| 20 | RAA, APLPA                                        | 22 | 16,888,899-20,725,309 | del | 3.8 | 22q11.2 DS                        |               | /      | TP, Autopsy <sup>a</sup>  |
| 21 | VSD, PS                                           | 22 | 18,636,749-21,800,471 | del | 3.1 | 22q11.2 DS                        |               | denovo | TP                        |
| 22 | VSD, CoA                                          | 22 | 18,648,855-21,800,471 | del | 3.1 | 22q11.2 DS                        |               | /      | TP                        |
| 23 | DORV, VSD, PA                                     | 22 | 18,939,748-21,721,712 | del | 2.7 | 22q11.2 DS                        |               | denovo | TP, Autopsy <sup>c</sup>  |
| 24 | RAA, VSD, left superior vena cava                 | 22 | 19,004,071-21,800,471 | del | 2.7 | 22q11.2 DS                        |               | /      | TP, Autopsy <sup>a</sup>  |
| 25 | RAA, VSD                                          | 22 | 18,901,201-21,480,190 | del | 2.5 | 22q11.2 DS                        |               | /      | TP                        |
| 26 | TOF                                               | 22 | 18,906,341-21,460,123 | del | 2.5 | 22q11.2 DS                        |               | /      | TP, Autopsy <sup>a</sup>  |
| 27 | TOF                                               | 22 | 18,978,201-21,926,534 | del | 2.9 | 22q11.2 DS                        |               | /      | TP, Autopsy <sup>a</sup>  |
| 28 | TOF, RAA, absence of ductus arteriosus            | 22 | 18,636,750-21,800,471 | del | 3.1 | 22q11.2 DS                        |               | /      | TP, Autopsy <sup>a</sup>  |
| 29 | VSD, CoA                                          | 22 | 18,648,856-21,800,471 | del | 3.1 | 22q11.2 DS                        |               | /      | TP, Autopsy <sup>b2</sup> |
| 30 | TOF, RAA, thymus aplasia                          | 22 | 18,648,856-21,058,888 | del | 2.4 | 22q11.2 DS                        |               | /      | TP, Autopsy <sup>a</sup>  |
| 31 | IAA, type A, aortic stenosis, ARSA                | 22 | 18,648,856-21,800,471 | del | 3.1 | 22q11.2 DS                        |               | /      | TP, Autopsy <sup>c</sup>  |
| 32 | TOF                                               | 22 | 18,882,825-21,796,237 | del | 3.1 | 22q11.2 DS                        |               | /      | TP                        |
| 33 | TOF (PA-VSD)                                      | 22 | 18,927,431-21,427,431 | del | 2.5 | 22q11.2 DS                        |               | /      | TP                        |
| 34 | Single ventricle, single atrium, CAT              | 22 | 46933489-51219152     | del | 4.2 | PHMDS                             | <i>SHANK3</i> | denovo | TP                        |

|    |                                                    |    |                             |     |      |                          |                                                                                                  |        |                          |
|----|----------------------------------------------------|----|-----------------------------|-----|------|--------------------------|--------------------------------------------------------------------------------------------------|--------|--------------------------|
| 35 | TAPVC, accessory ear, micrognathia                 | 22 | 16050230-18679614           | dup | 2.6  | CES                      |                                                                                                  | /      | TP, Autopsy <sup>a</sup> |
| 36 | RAA                                                | X  | 2,703,661-6,609,379         | del | 3.9  |                          | <i>ARSL</i>                                                                                      | denovo | Birth                    |
| 37 | TOF (PA-VSD), RAA,<br>left superior vena cava, SUA | X  | 168,552-55,508,714          | Del | 55.3 | LWD,<br>Xq28 duplication | <i>SHOX</i> ,<br><i>DMD</i> ,<br><i>USP9X</i> ,<br><i>GATA1</i> ,<br><i>PIGA</i><br><i>MECP2</i> | /      | TP, Autopsy <sup>a</sup> |
|    |                                                    |    | 55,509,386-155,233,098      | dup | 99.7 |                          |                                                                                                  |        |                          |
| 38 | VSD, holoprosencephaly, facial<br>abnormality      | X  | 134,743,723-<br>155,043,723 | dup | 20.3 | Xq28 duplication         | <i>MECP2</i>                                                                                     | /      | TP                       |

MCDK, multicystic dysplastic kidney; SUA, single umbilical artery; CoA, coarctation of aorta; CAT, common arterial trunk; CCAM, congenital cystic adenomatoid malformation; APVS, absent pulmonary valve syndrome; APLPA, anomalous origin of left pulmonary from the ascending aorta; ARSA, aberrant right subclavian artery; DS: deletion syndrome; del: deletion; dup: duplication; WBS: Williams-Beuren Syndrome; SMS: Smith-Magenis syndrome; HNPP: Hereditary Liability to Pressure Palsies; MDLS: Miller-Dieker lissencephaly syndrome; PHMDS: Phelan-McDermid syndrome; CES: Cat eye syndrome; LWD: Leri-Weill dyschondroostosis; LTF, lost to follow-up; TP, terminal pregnancy.

<sup>a</sup> autopsy results are consistent with prenatal ultrasound.

<sup>b1</sup> autopsy revealed repeated bladder and anal atresia, others were consistent with prenatal ultrasound.

<sup>b2</sup> autopsy result is IAA, type B.

<sup>c</sup> autopsy also found thymus hypoplasia/aplasia.

Bold font is the genes discussed in the article.

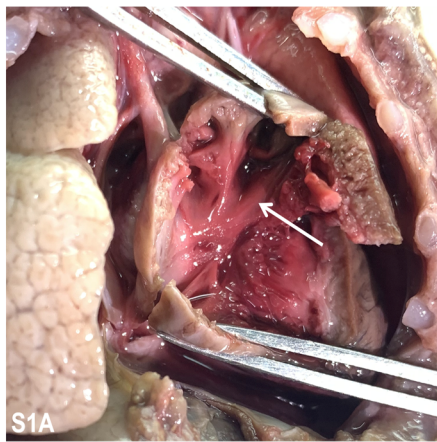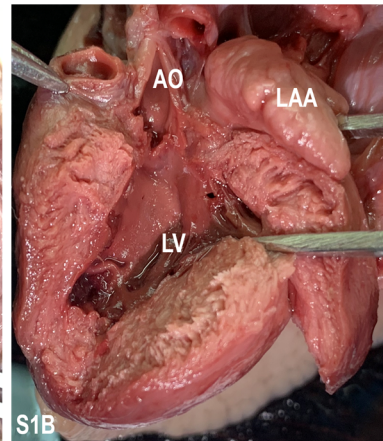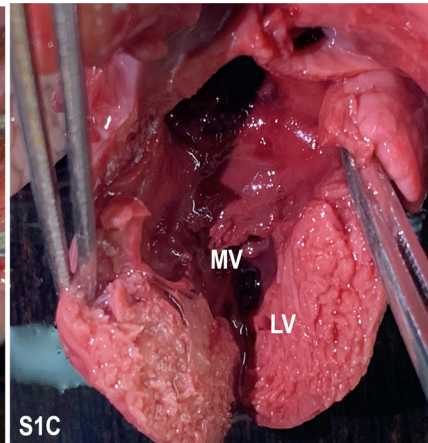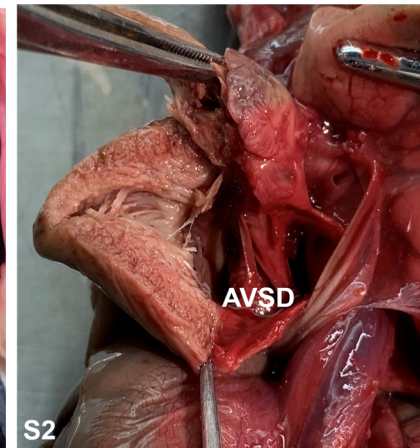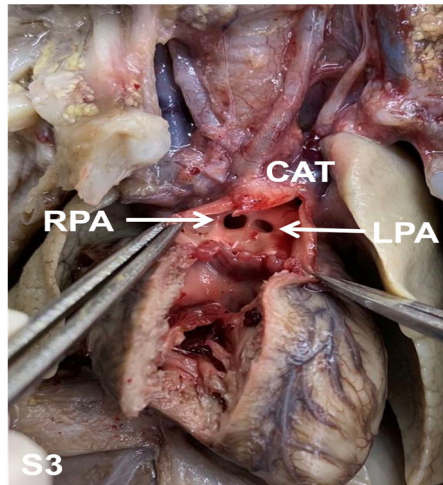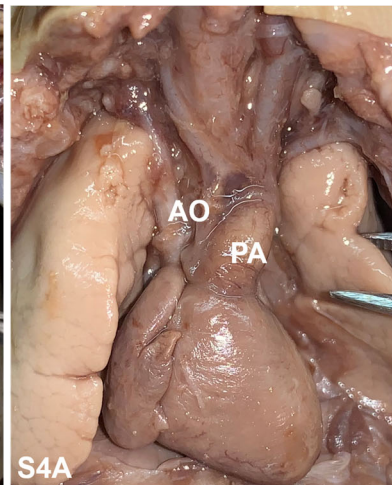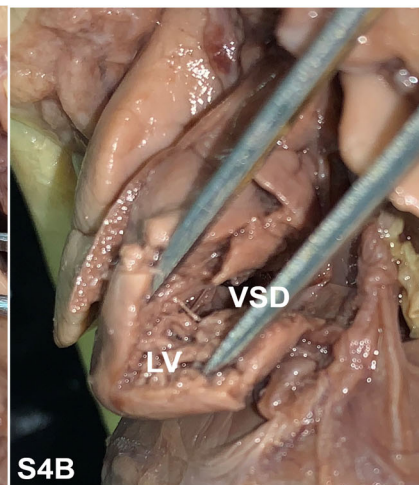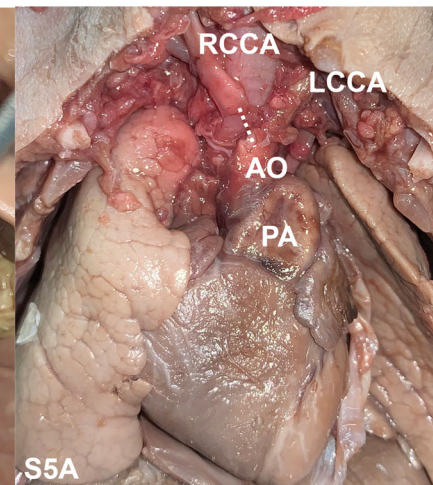



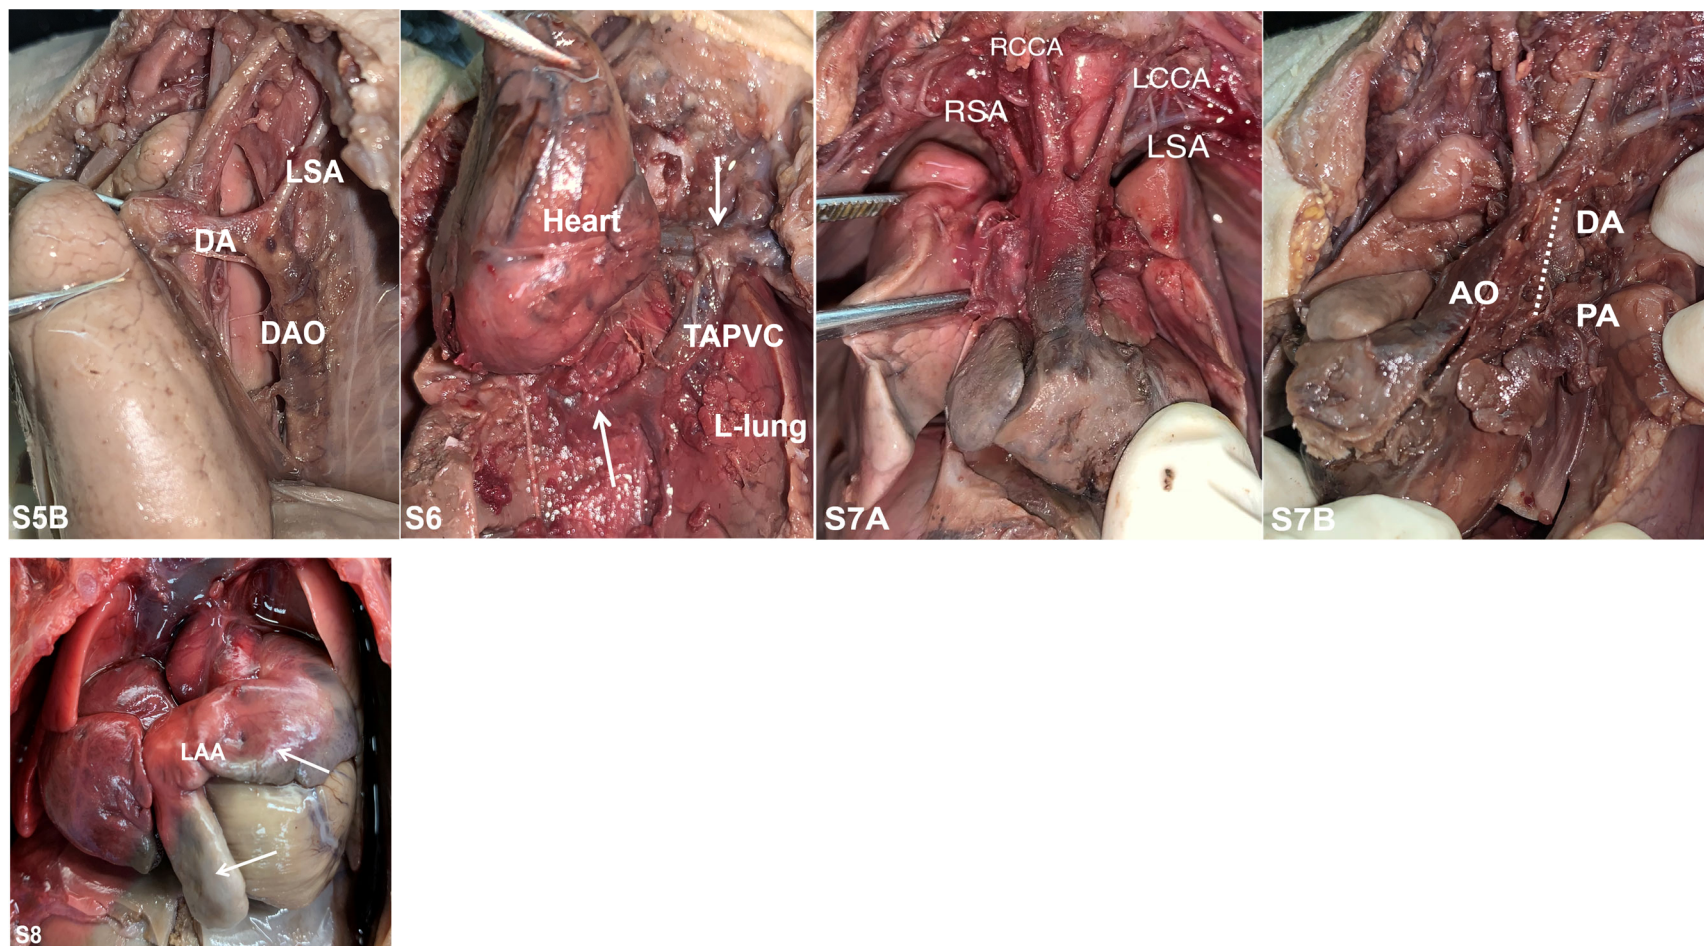

**Figure S1-S8 shows the autopsy of CHD fetus.**

Fig S1, mitral valve dysplasia; S1A, arrow shows no foramen ovale; S1B, LV and LAA thickening, stenosis aorta; S1C, mitral valve dysplasia, CNV result was VUS; Fig S2, complete type AVSD, trisomy 18; Fig S3 shows case 5 in table 2, autopsy results show CAT (type II); Fig S4 shows

case 7 in table 2; S4A, aorta dysplasia; S4B, LV is very small, VSD can be seen. Fig S5 shows case 29; S5A, only two blood vessels are sent out in ascending aorta; S5B, LSA is sent from descending Ao. Figure S6 shows case 35, and the arrows show common vena cava and vertical vein, respectively; Figure S7 shows case 37; S7A, RAA with mirror image branching; S7B, PA atresia, left and right pulmonary arteries supplied by DA. Dotted line, blood vessel accidentally broken; LAA, left atrial appendage; Ao, aorta; PA, pulmonary artery; LV, left ventricle; MV, mitral valve; CAT, common arterial trunk; LCCA, left common carotid artery; RCCA, right common carotid artery; LSA, subclavian artery; DA, ductus arteriosus. Fig S8, prenatal diagnosis of abnormal cardiac function, autopsy found a huge LAA, CNV result was VUS.
